# Supplementary material for: FTIR Analysis of Renal Tissue for the Assessment of Hypertensive Organ Damage and proANP31–67 Treatment
Source: MDPI journal article supplement (doi:10.3390/ijms24065196), 2023-03-08
Supplement: s1 [file s1]

## Supplementary Material

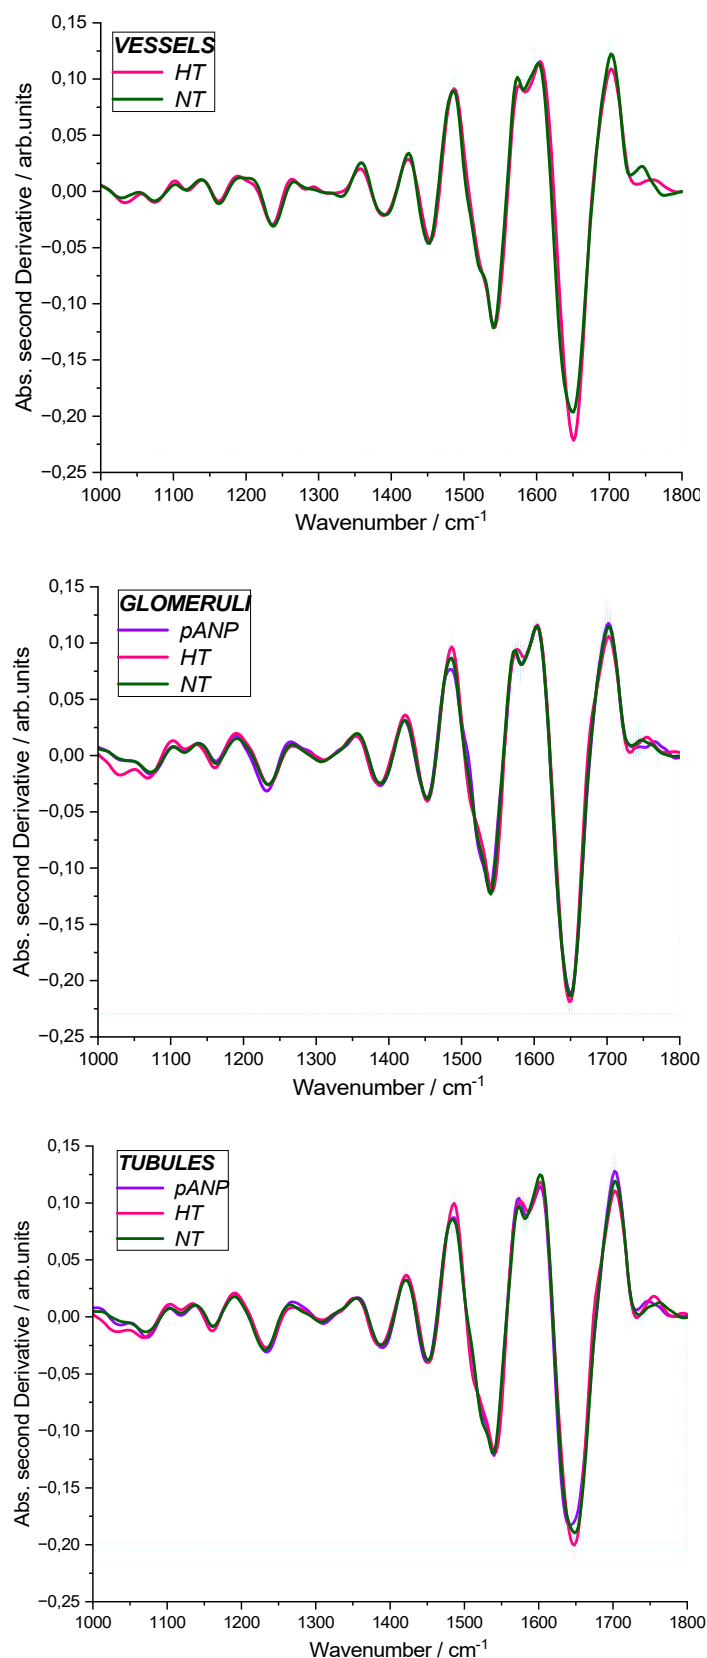

**Figure S1.** Mean second derivative profiles (with standard deviations reproduced as shadowed areas) of different renal structures, i.e. vessels, glomeruli, and tubules. The comparison of data shows that spectra obtained for tissues of NT and pANP samples are very similar in the whole 1000-1800 cm<sup>-1</sup> range. Differently, HT profiles show significant differences in the intensity of

Amide I band of vessels (1620-1680  $\text{cm}^{-1}$ ), and in the carbohydrates/glycoprotein bands of glomeruli and tubules (1000-1180  $\text{cm}^{-1}$ ).

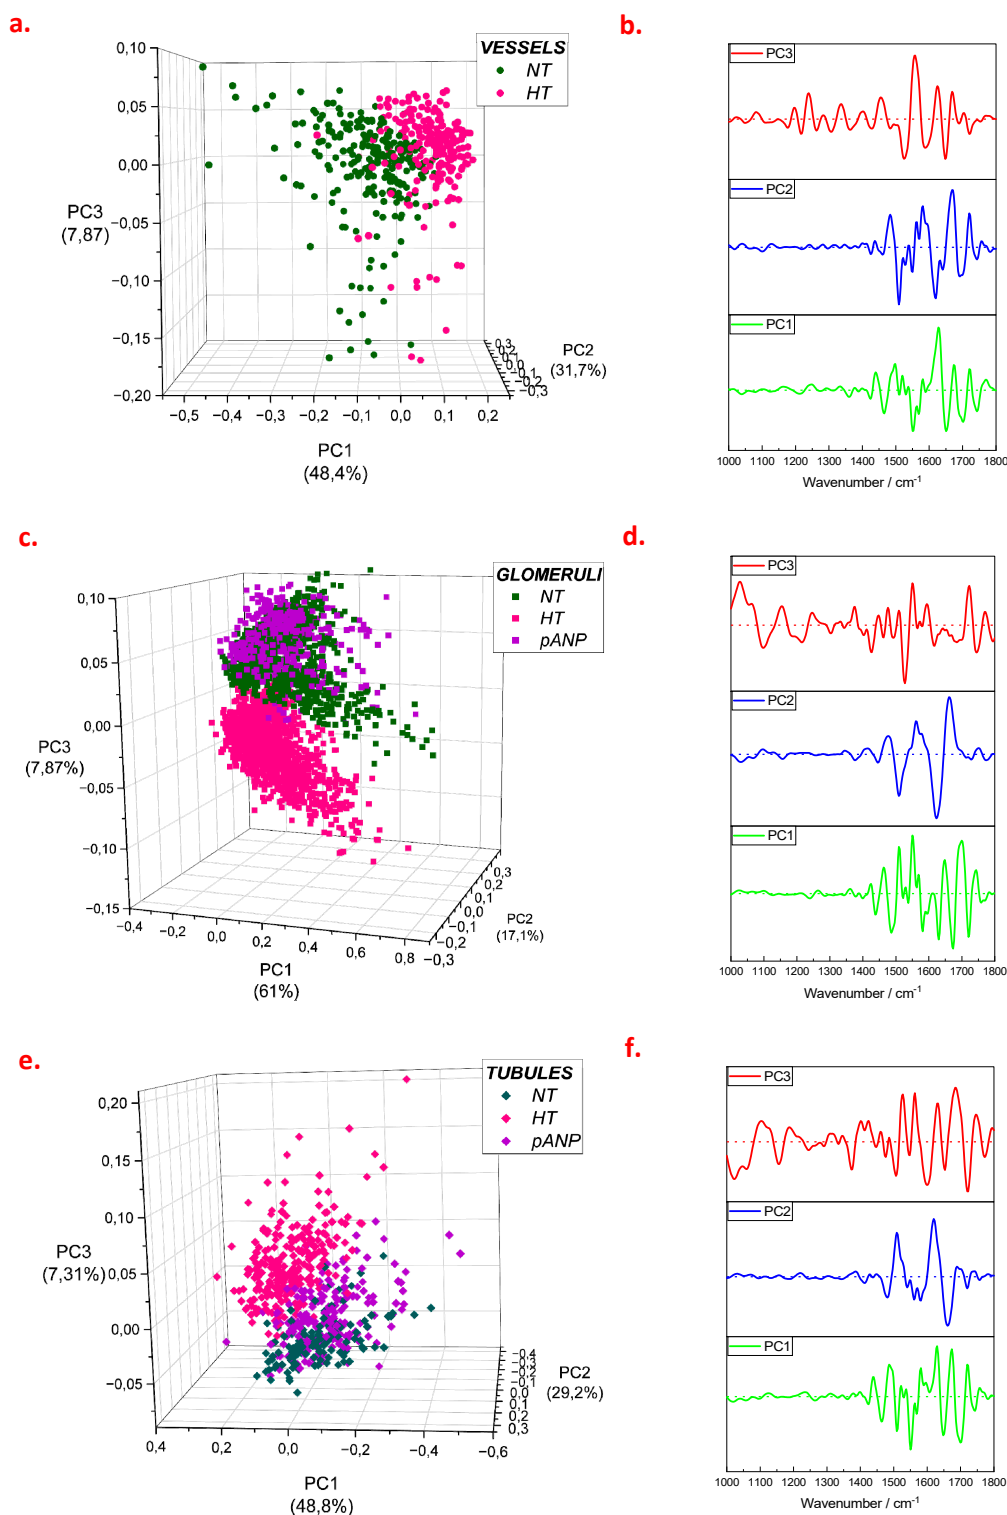

**Figure S2.** PCA scores (a,c,e) and loadings (b,d,f) from separate analysis of 1000-1800  $\text{cm}^{-1}$  spectral range of vessels (a,b), glomeruli (c,d), and tubules (e,f). Different loadings were obtained for the different structures. The most significant contributions to PC1 and PC2 second derivative profiles are very similar to those obtained with the PCA of the entire dataset (see Fig.3): the only difference is the opposite sign of loadings and scores of PC2 in the case of tubules. A similar conclusion holds for PC3 of glomeruli and tubules. The third component obtained for vessel spectra does not display

a high intensity at 1000-1150  $\text{cm}^{-1}$ , indicating that carbohydrate/glycoprotein content does not influence NT and HT vessel differentiation as observed with the previous PCA.

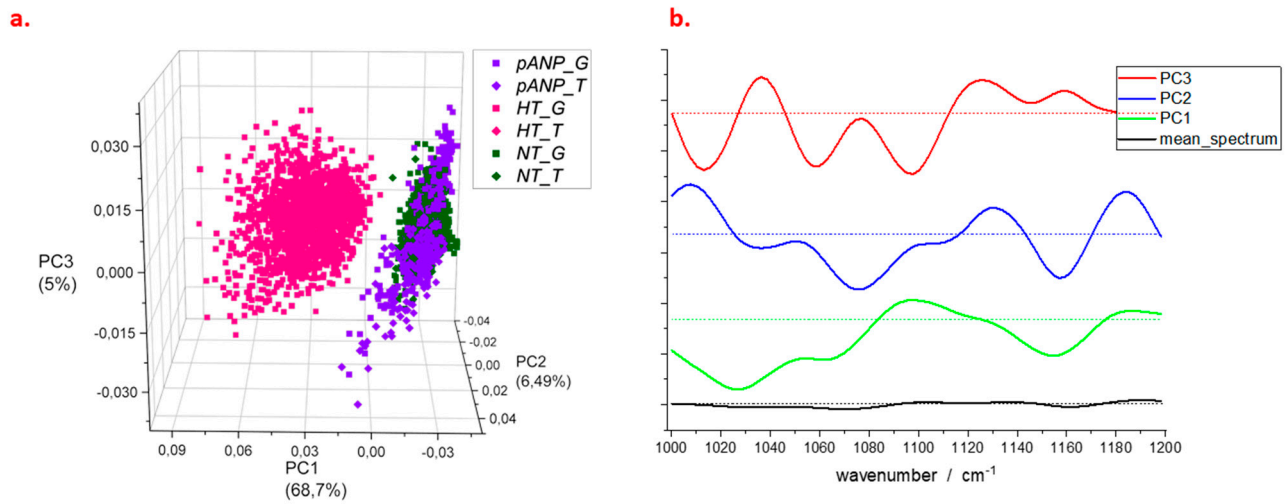

**Figure S3.** PCA scores (a) and loadings (b) from analysis of 1000-1200  $\text{cm}^{-1}$  spectral range of entire dataset.

Dashed lines indicate the zero intensity in each PC plot.

**Table S1. Significant correlations – p values**

|                              | Glomeruli<br>L/CG | Glomeruli<br>P/FAA | Glomeruli<br>L/FAA | Tubules<br>L/CG | Tubules<br>P/FAA | Tubules<br>L/FAA |
|------------------------------|-------------------|--------------------|--------------------|-----------------|------------------|------------------|
| GFR (mL/min)                 | ns                | ns                 | ns                 | ns              | ns               | ns               |
| U-Albumin<br>(mg/L/100 g BW) | ns                | ns                 | ns                 | ns              | ns               | ns               |
| Kidney fibrosis              | ns                | 0.0147*            | ns                 | ns              | ns               | ns               |

GFR, glomerular filtration rate; U-Albumin, urine albumin

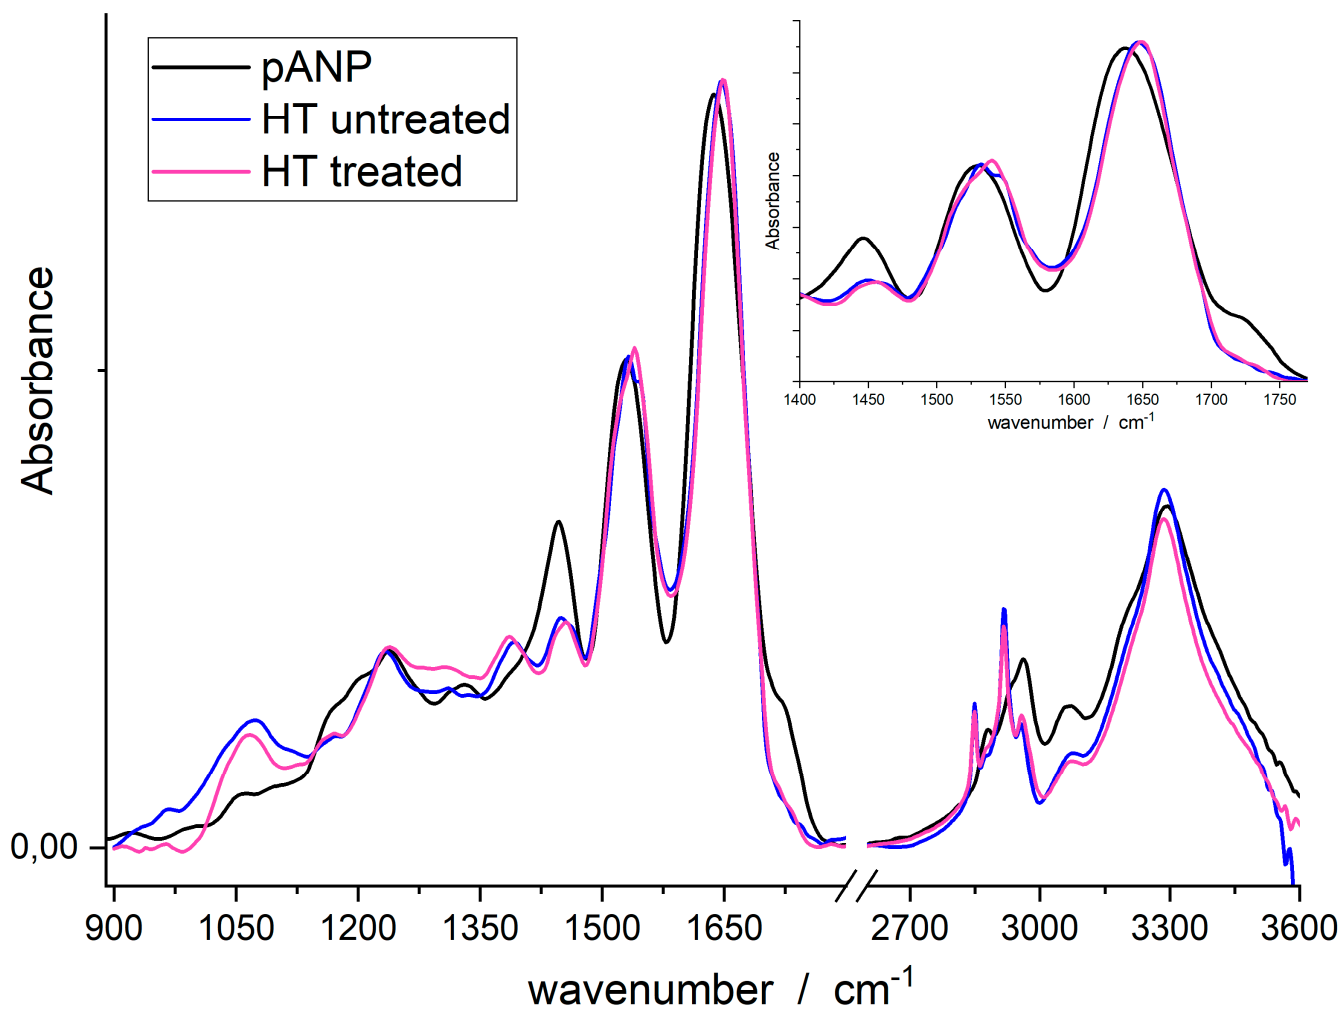

**Figure S4.** FTIR spectra obtained for glomeruli of proANP-treated and untreated rats are shown and compared to the one of proANP: there is no clear signature indicating the presence of the drug in the spectrum of pANP samples. Similar results were also obtained for tubules.

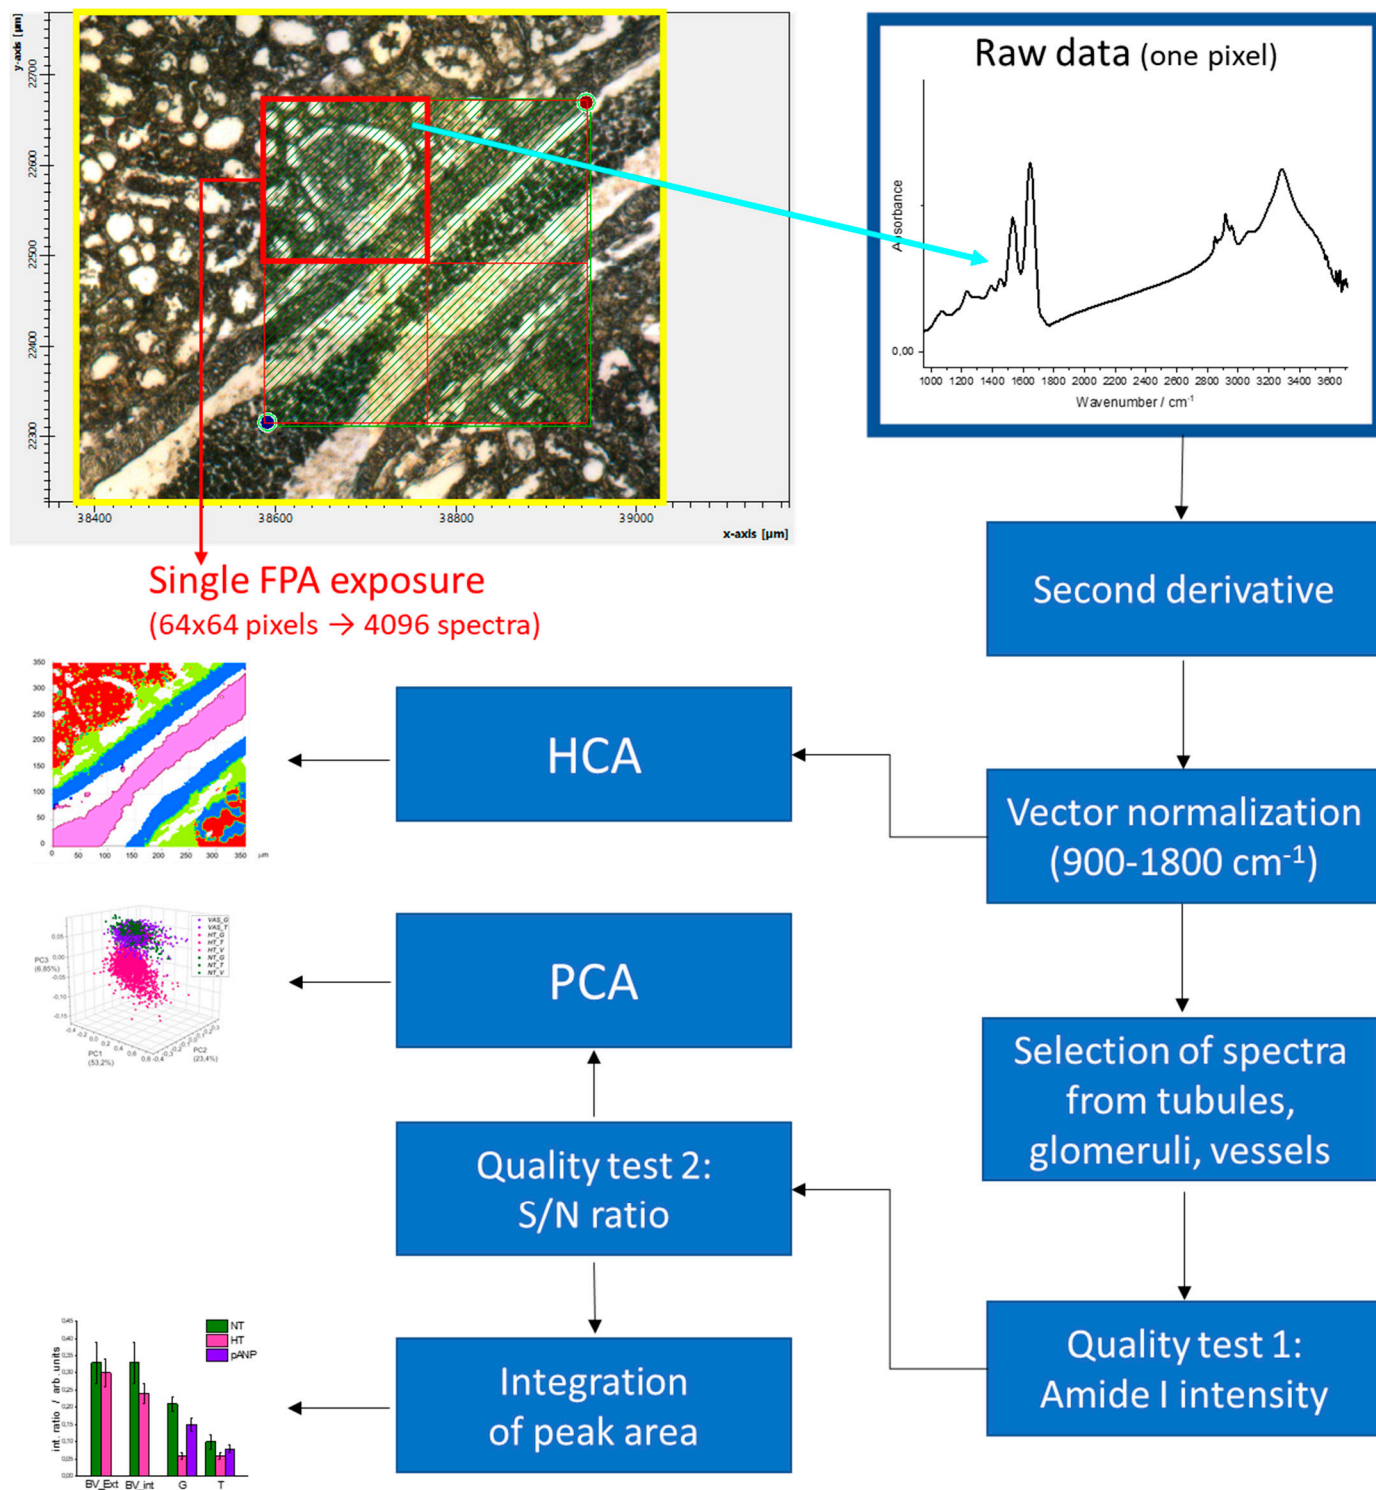

**Figure S5.** Flow chart of spectra manipulations
